# Supplementary material
Source: publisher figshare collection journal article supplement (https://acs.figshare.com/ndownloader/files/5175313)
Supplement: Supplementary file 1 [file 5175313]

## Supporting Information

### **Grafting Nitrilotriacetic Groups onto Carboxylic Acid-Terminated Self-Assembled Monolayers on Gold Surfaces for Immobilization of Histidine-Tagged Proteins**

Jungkyu K. Lee, Yang-Gyun Kim,<sup>†</sup> Young-Shik Chi, Wan Soo Yun,<sup>‡</sup> and Insung S. Choi\*

Department of Chemistry and School of Molecular Science (BK21), Center for Molecular Design and Synthesis, Korea Advanced Institute of Science and Technology (KAIST), Daejeon 305-701, Korea

<sup>†</sup> Department of Biochemistry, College of Medicine, Chung-Ang University, 221 Heuksuk-dong, Dongjak-gu, Seoul 156-756, Korea

<sup>‡</sup> Electronic Device Group, Korea Research Institute of Standards and Science (KRISS), Daejeon 305-600, Korea

**Table S1.** IR peak assignment of the SAMs before and after the coupling.

**Table S2.** XPS peak assignment of the SAMs before and after the coupling.

**Table S3.** Comparison between the experimentally determined atomic percentages from XPS data and the theoretical values calculated for different coverages in the SAM of *C15-COOH*.

**Table S4.** Comparison between the experimentally determined atomic percentages from XPS data and the theoretical values calculated for different coverages in the SAM of *EG3-COOH*.

**Table S5.** Comparison between the experimentally determined atomic percentages from XPS data and the theoretical values calculated for different coverages in the SAM of *EG5-COOH*.

**Figure S1.** SPR signals on non-specific adsorption of GFPs on COOH-terminated SAMs of (a) C15-COOH, (b) EG3-COOH, and (c) EG5-COOH. Each set of the experiments (indicated by the numbers) was performed with a different flow rate and a different concentration of the GFP protein solution (1: 5  $\mu\text{L}/\text{min}$  and 0.01 mg/mL, 2: 5  $\mu\text{L}/\text{min}$  and 0.1 mg/mL, 3: 20  $\mu\text{L}/\text{min}$  and 0.1 mg/mL, 4: 10  $\mu\text{L}/\text{min}$  and 0.1 mg/mL).

**Table S1. IR Peak Assignment of the SAMs before and after the Coupling.**

| Band Frequency (cm <sup>-1</sup> ) |         |          |         |                                   |
|------------------------------------|---------|----------|---------|-----------------------------------|
| C15-COOH                           | C15-NTA | EG3-COOH | EG3-NTA | Mode                              |
|                                    |         | EG5-COOH | EG5-NTA |                                   |
|                                    |         | 2930 sh  | 2934 sh | $\nu_a(\text{CH}_2)$ of EG        |
| 2917                               | 2918    | 2918     | 2918    | $\nu_s(\text{CH}_2)$ of alkyl     |
|                                    |         | 2870     | 2872    | $\nu_a(\text{CH}_2)$ of EG        |
| 2848                               | 2849    | 2856 sh  | 2856 sh | $\nu_s(\text{CH}_2)$ of alkyl     |
| 1738                               | 1721    | 1750     | 1748    | $\nu(\text{C=O})$ free            |
| 1718                               |         |          |         | $\nu(\text{C=O})$ hydrogen bonded |
|                                    | 1677 sh |          | 1670    | Amide I                           |
|                                    | 1550    |          | 1554    | Amide II                          |
| 1470                               | 1407    | 1465     | 1355    | $\delta(\text{CH}_2)$             |
|                                    |         | 1133     | 1133    | $\nu(\text{C-O})$                 |

**Table S2. XPS Peak Assignment of the SAMs before and after the Coupling.**

| Binding Energy (eV) |         |         |         |                      |
|---------------------|---------|---------|---------|----------------------|
| EG3-COOH            | C15-NTA | EG3-NTA | EG5-NTA | Core level           |
|                     | 856     | 856     | 856     | Ni 2p <sub>3/2</sub> |
| 763                 | 763     | 763     | 763     | Au 4s                |
| 643                 | 643     | 643     | 643     | Au 4p <sub>1/2</sub> |
| 547                 | 547     | 547     | 547     | Au 4p <sub>3/2</sub> |
| 531                 | 531     | 531     | 531     | O 1s                 |
|                     | 402     | 402     | 402     | N 1s                 |
| 354                 | 354     | 354     | 354     | Au 4d <sub>3/2</sub> |
| 336                 | 336     | 336     | 336     | Au 4d <sub>5/2</sub> |
| 284.6               | 284.6   | 284.6   | 284.6   | C 1s                 |
| 89                  | 89      | 89      | 89      | Au 4f <sub>5</sub>   |
| 85                  | 85      | 85      | 85      | Au 4f <sub>7</sub>   |

**Table S3. Comparison between the Experimentally Determined Atomic Percentages from XPS Data and the Theoretical Values Calculated for Different Coverages in the SAM of *C15-COOH*.**

|     | 50%<br>theoretical | 30%<br>theoretical | 25%<br>theoretical | 20%<br>theoretical | Experimental |
|-----|--------------------|--------------------|--------------------|--------------------|--------------|
| %C  | 72.41              | 76.00              | 77.08              | 78.26              | 89.42        |
| %O  | 18.96              | 16.39              | 15.62              | 14.78              | 6.02         |
| %S  | 3.45               | 3.72               | 4.17               | 4.35               | 2.36         |
| %N  | 3.45               | 2.40               | 2.08               | 1.74               | 1.50         |
| %Ni | 1.72               | 1.20               | 1.04               | 0.87               | 0.70         |
| N/S | 1                  | 0.65               | 0.50               | 0.40               | 0.63         |

**Table S4. Comparison between the Experimentally Determined Atomic Percentages from XPS Data and the Theoretical Values Calculated for Different Coverages in the SAM of *EG3-COOH*.**

|     | 50%<br>theoretical | 30%<br>theoretical | 25%<br>theoretical | 20%<br>theoretical | experimental |
|-----|--------------------|--------------------|--------------------|--------------------|--------------|
| %C  | 66.66              | 68.75              | 69.35              | 70.00              | 85.07        |
| %O  | 26.38              | 25.31              | 25                 | 24.67              | 11.96        |
| %S  | 2.27               | 3.10               | 3.22               | 3.33               | 2.40         |
| %N  | 2.27               | 1.87               | 1.61               | 1.33               | 1.20         |
| %Ni | 1.13               | 0.94               | 0.80               | 0.67               | 0.40         |
| N/S | 1                  | 0.60               | 0.50               | 0.40               | 0.49         |

**Table S5. Comparison between the Experimentally Determined Atomic Percentages from XPS Data and the Theoretical Values Calculated for Different Coverages in the SAM of *EG5-COOH*.**

|     | 50%<br>theoretical | 30%<br>theoretical | 25%<br>theoretical | 20%<br>theoretical | experimental |
|-----|--------------------|--------------------|--------------------|--------------------|--------------|
| %C  | 66.66              | 68.43              | 68.92              | 69.44              | 68.04        |
| %O  | 27.38              | 26.56              | 26.35              | 26.11              | 26.81        |
| %S  | 2.38               | 2.63               | 2.70               | 2.78               | 3.26         |
| %N  | 2.38               | 1.58               | 1.35               | 1.11               | 1.53         |
| %Ni | 1.19               | 0.79               | 0.67               | 0.55               | 0.35         |
| N/S | 1                  | 0.60               | 0.50               | 0.40               | 0.47         |

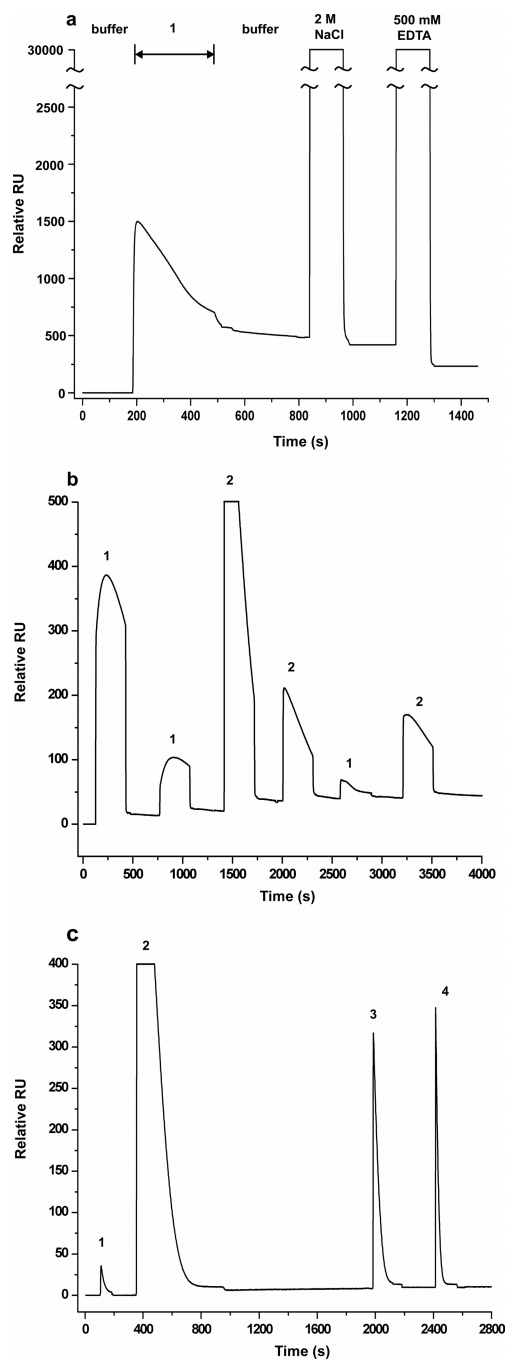

**Figure S1**
